# Supplementary material for: Host ecology regulates interspecies recombination in bacteria of the genus Campylobacter
Source: eLife journal article supplement (doi:10.7554/elife.73552), 2022-02-22

# *C. jejuni*

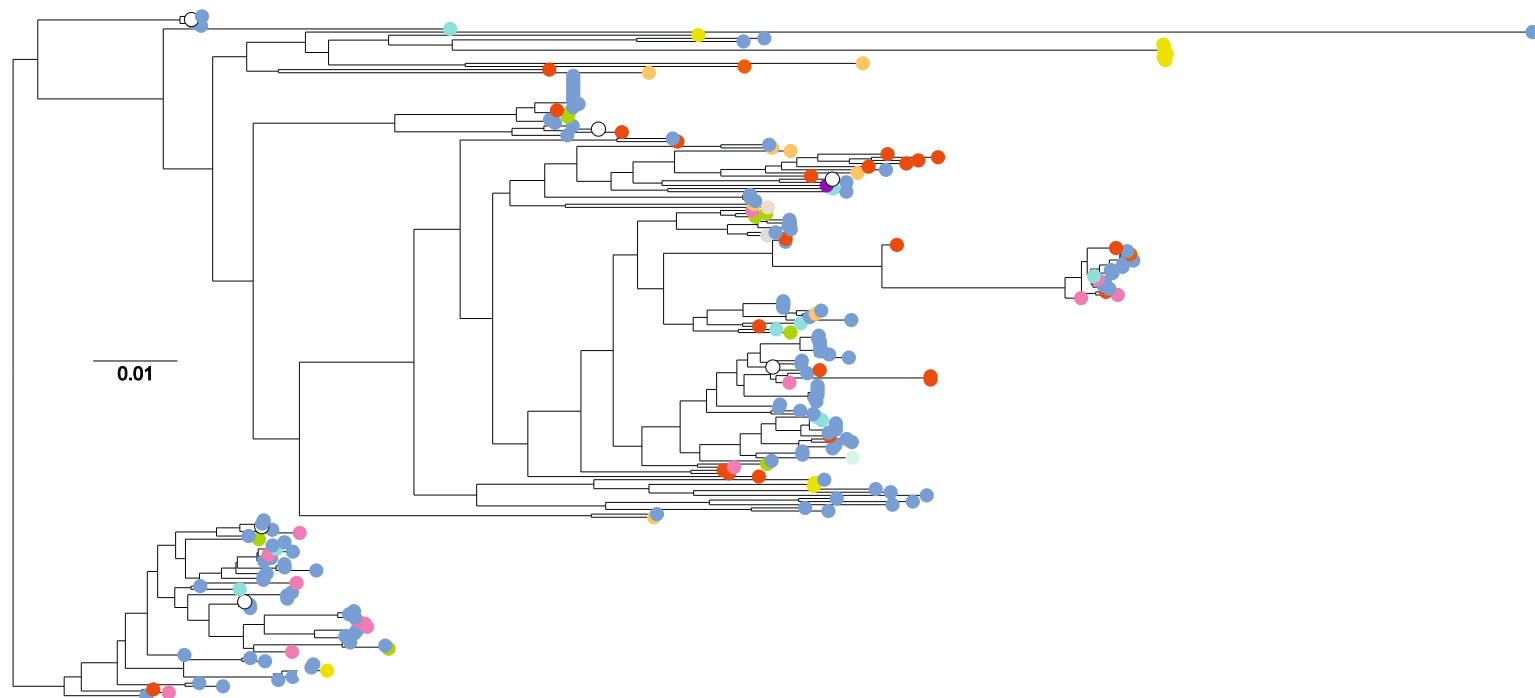

# *C. coli*

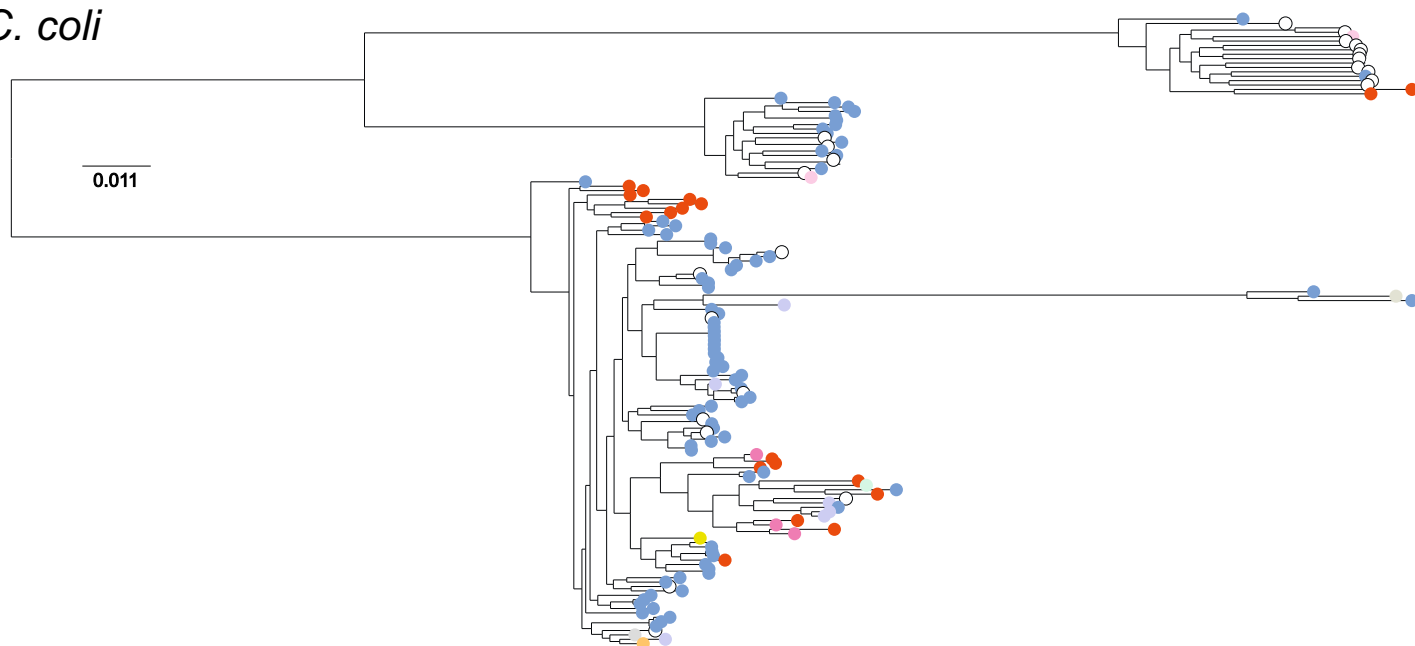

# *C. fetus*

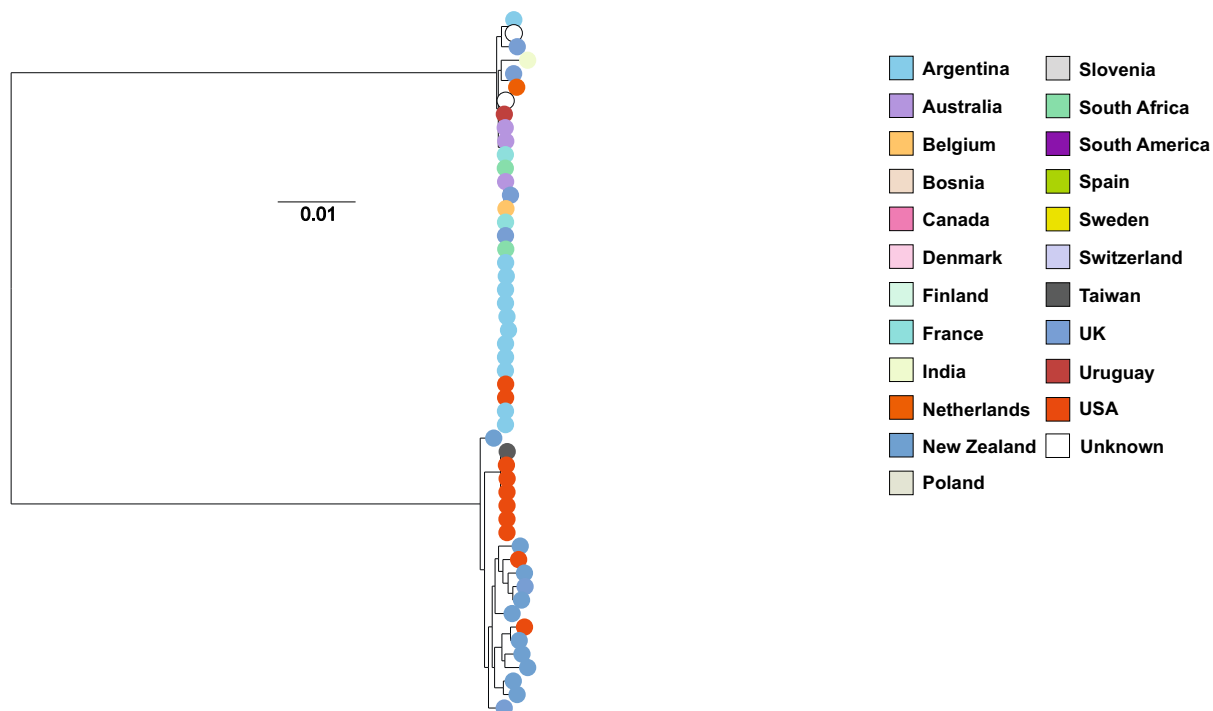

Supplement: supp [file elife-73552-supp-v1.zip]
