# Supplementary material for: Host ecology regulates interspecies recombination in bacteria of the genus Campylobacter
Source: eLife journal article supplement (doi:10.7554/elife.73552), 2022-02-22

*C. jejuni* (n=218)

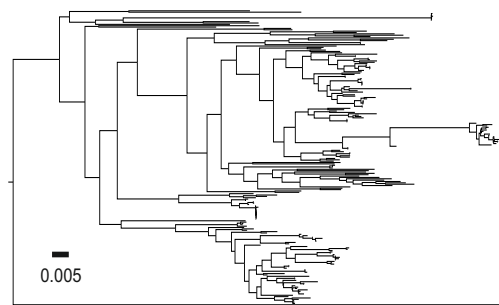

*C. coli* (n=143)

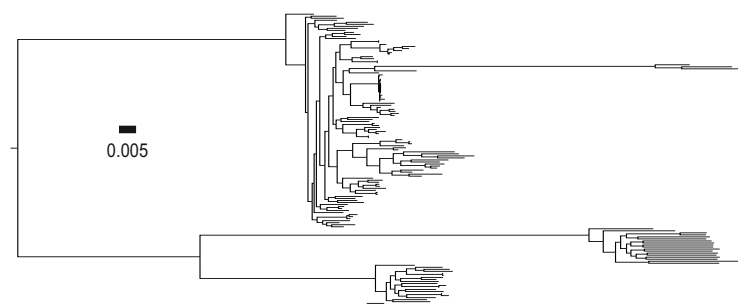

*C. concisus* (n=106)

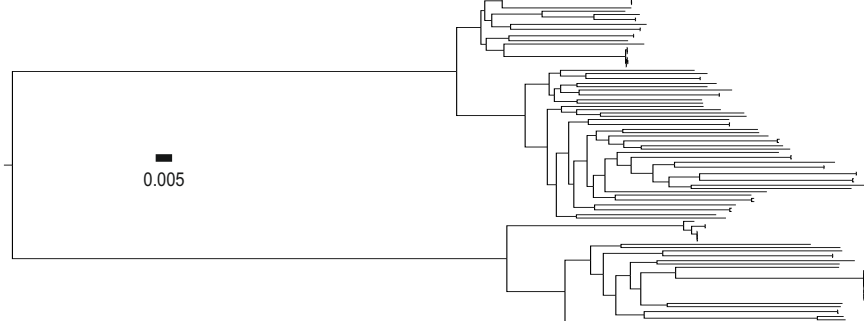

*C. fetus* (n=52)

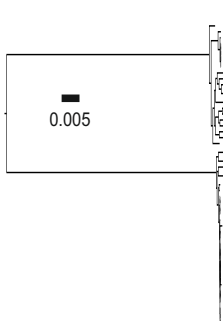

*C. lanienae* (n=26)

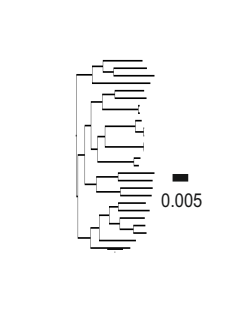

*C. hyointestinalis* (n=16)

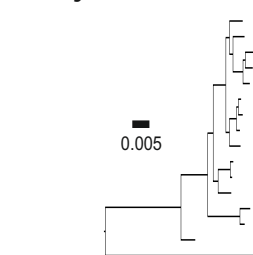

*C. lari* (n=13)

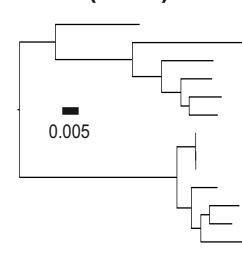

*C. hepaticus* (n=10)\*

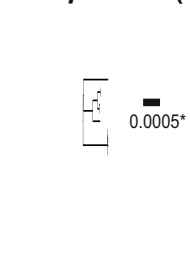

*C. pinnipediorum* (n=9)

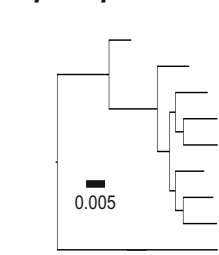

Supplement: supp [file elife-73552-supp-v1.zip]
