# Supplementary material for: Host ecology regulates interspecies recombination in bacteria of the genus Campylobacter
Source: eLife. 2022 Feb 22;11:e73552. doi: 10.7554/eLife.73552 (PMC8912921; doi:10.7554/eLife.73552)
Supplement: Supplementary file 5. [file elife-73552-supp5.xlsx]

## Sheet: Sheet1
	Supplementary Table 5. Genes involved in interspecies recombination in 10 group comparisons
	Pair species comparisons	Gene	Locustag with gene name when available	Found on plasmid	Location	Location start	Location end	Length of gene	Strand	Length of protein	PID	COG	Product	COG code	COG description
	8	Cj0279	carB		255089..258358	255089	258358	3269	+	1089	218561941	COG0458EF	carbamoyl phosphate synthase large subunit	E	Amino acid transport and metabolism genes
	8	Cj0366C	cmeB		332596..335718	332596	335718	3122	-	1040	218562024	COG0841V	inner membrane efflux transporter CmeB	V	Defense mechanisms genes
	7	Cj0039C	typA	Y	57211..59019	57211	59019	1808	-	602	218561731	COG1217T	GTP-binding protein TypA	T	Signal transduction mechanisms genes
	7	Cj0845C	gltX		791924..793219	791924	793219	1295	-	431	218562473	COG0008J	glutamylglutaminyl-tRNA synthetase	J	Translation
	7	Cj1188C	gidA		1115243..1117102	1115243	1117102	1859	-	619	218562800	COG0445D	tRNA uridine 5-carboxymethylaminomethyl modification enzyme GidA	D	Cell cycle control, mitosis and meiosis genes
	7	Cj1266C	hydB		1195496..1197211	1195496	1197211	1715	-	571	218562878	COG0374C	Ni/Fe-hydrogenase large subunit	C	Energy production and conversion genes
	6	Cj0013	ilvD		17563..19239	17563	19239	1676	+	558	218561706	COG0129EG	dihydroxy-acid dehydratase	G	Carbohydrate transport and metabolism genes
	6	Cj0293	surE		269064..269840	269064	269840	776	+	258	218561952	COG0496R	stationary phase survival protein SurE	R	General function prediction only
	6	Cj0367C	cmeA		335718..336821	335718	336821	1103	-	367	218562025	COG0845M	periplasmic fusion protein CmeA	M	Cell wall/membrane biogenesis genes
	6	Cj0626	hypE		586190..587164	586190	587164	974	+	324	218562277	COG0309O	hydrogenase isoenzymes formation protein	O	Posttranslational modification, protein turnover, chaperones genes
	6	Cj0631C	Cj0631c		592495..594429	592495	594429	1934	-	644	218562281	COG0557K	putative ribonuclease	K	Transcription
	6	Cj0995C	hemB		926169..927152	926169	927152	983	-	327	218562611	COG0113H	delta-aminolevulinic acid dehydratase	H	Coenzyme transport and metabolism genes
	6	Cj1024C	flgR		955269..956570	955269	956570	1301	-	433	218562640	COG2204T	sigma-54 associated transcriptional activator	T	Signal transduction mechanisms genes
	6	Cj1052C	mutS		987019..989229	987019	989229	2210	-	736	218562668	COG1193L	recombination and DNA strand exchange inhibitor protein	L	Replication, recombination and repair
	6	Cj1092C	secF		1025265..1026236	1025265	1026236	971	-	323	218562706	COG0341U	preprotein translocase subunit SecF	U	Intracellular trafficking and secretion genes
	6	Cj1359	ppk		1291131..1293215	1291131	1293215	2084	+	694	218562968	COG0855P	polyphosphate kinase	P	Inorganic ion transport and metabolism genes
	5	Cj0136	infB	Y	136856..139471	136856	139471	2615	+	871	218561817	COG0532J	translation initiation factor IF-2	J	Translation
	5	Cj0003	gyrB		2579..4888	2579	4888	2309	+	769	218561696	COG0187L	DNA gyrase subunit B	L	Replication, recombination and repair
	5	Cj0023	purB		28382..29710	28382	29710	1328	+	442	218561716	COG0015F	adenylosuccinate lyase	F	Nucleotide transport and metabolism genes
	5	Cj0288C	lpxB		265431..266525	265431	266525	1094	-	364	218561950	COG0763M	ipid-A-disaccharide synthase	M	Cell wall/membrane biogenesis genes
	5	Cj0328C	fabH		298883..299857	298883	299857	974	-	324	218561987	COG0332I	3-oxoacyl-(acyl carrier protein) synthase III	I	Lipid transport and metabolism genes
	5	Cj0382C	nusB		348741..349139	348741	349139	398	-	132	218562040	COG0781K	transcription antitermination protein NusB	K	Transcription
	5	Cj0625	hypD		585102..586193	585102	586193	1091	+	363	218562276	COG0409O	hydrogenase isoenzymes formation protein	O	Posttranslational modification, protein turnover, chaperones genes
	5	Cj0662c	hslU		619078..620397	619078	620397	1319	-	439	218562307	COG1220O	ATP-dependent protease ATP-binding subunit HslU	O	Posttranslational modification, protein turnover, chaperones genes
	5	Cj0856	lepP		802203..803051	802203	803051	848	+	282	218562484	COG0681U	signal peptidase I	U	Intracellular trafficking and secretion genes
	5	Cj0857C	moeA		803073..804233	803073	804233	1160	-	386	218562485	COG0303H	putative molybdopterin biosynthesis protein	H	Coenzyme transport and metabolism genes
	5	Cj0933C	pycB		867765..869564	867765	869564	1799	-	599	218562552	COG5016C	putative pyruvate carboxylase B subunit	C	Energy production and conversion genes
	5	Cj1026C	Cj1026c		957052..957567	957052	957567	515	-	171	218562642	COG3018S	putative lipoprotein	S	Function unknown genes
	5	Cj1027C	gyrA		957631..960222	957631	960222	2591	-	863	218562643	COG0188L	DNA gyrase subunit A	L	Replication, recombination and repair
	5	Cj1030c	lepA		961556..963352	961556	963352	1796	-	598	218562646	COG0481M	GTP-binding protein LepA	M	Cell wall/membrane biogenesis genes
	5	Cj1061C	ileS		996777..999530	996777	999530	2753	-	917	218562677	COG0060J	isoleucyl-tRNA synthetase	J	Translation
	5	Cj1091C	leuS		1022826..1025255	1022826	1025255	2429	-	809	218562705	COG0495J	leucyl-tRNA synthetase	J	Translation
	5	Cj1093c	secD		1026236..1027816	1026236	1027816	1580	-	526	218562707	COG0342U	preprotein translocase subunit SecD	U	Intracellular trafficking and secretion genes
	5	Cj1126C	pglB		1057979..1060120	1057979	1060120	2141	-	713	218562740	COG1287R	oligosaccharide transferase to N-glycosylate proteins	R	General function prediction only
	5	Cj1686C	topA		1607360..1609462	1607360	1609462	2102	-	700	218563272	COG0550L	DNA topoisomerase I	L	Replication, recombination and repair
	4	Cj0024	nrdA		29726..32095	29726	32095	2369	+	789	218561717	COG0209F	ribonucleotide-diphosphate reductase subunit alpha	F	Nucleotide transport and metabolism genes
	4	Cj0146C	trxB		150638..151576	150638	151576	938	-	312	218561827	COG0492O	thioredoxin reductase	O	Posttranslational modification, protein turnover, chaperones genes
	4	Cj0155C	rpmE		158139..158339	158139	158339	200	-	66	218561836	COG0254J	50S ribosomal protein L31	J	Translation
	4	Cj0161C	moaA		161232..162194	161232	162194	962	-	320	218561842	COG2896H	molybdenum cofactor biosynthesis protein A	H	Coenzyme transport and metabolism genes
	4	Cj0282C	serB		259755..260378	259755	260378	623	-	207	218561944	COG0560E	putative phosphoserine phosphatase	E	Amino acid transport and metabolism genes
	4	Cj0284C	cheA		260904..263213	260904	263213	2309	-	769	218561946	COG0643NT	chemotaxis histidine kinase	T	Signal transduction mechanisms genes
	4	Cj0287C	greA		264934..265419	264934	265419	485	-	161	218561949	COG0782K	transcription elongation factor GreA	K	Transcription
	4	Cj0324	ubiE		295586..296293	295586	296293	707	+	235	218561983	COG2226H	ubiquinone/menaquinone biosynthesis methyltransferase	H	Coenzyme transport and metabolism genes
	4	Cj0326	serC		297463..298539	297463	298539	1076	+	358	218561985	COG1932HE	phosphoserine aminotransferase	E	Amino acid transport and metabolism genes
	4	Cj0381C	pyrF		347905..348744	347905	348744	839	-	279	218562039	COG0284F	orotidine 5'-phosphate decarboxylase	F	Nucleotide transport and metabolism genes
	4	Cj0383c	ribH		349139..349603	349139	349603	464	-	154	218562041	COG0054H	6,7-dimethyl-8-ribityllumazine synthase	H	Coenzyme transport and metabolism genes
	4	Cj0386	engA		351446..352828	351446	352828	1382	+	460	218562044	COG1160R	GTP-binding protein EngA	R	General function prediction only
	4	Cj0409	frdA		373355..375346	373355	375346	1991	+	663	218562067	COG1053C	fumarate reductase flavoprotein subunit	C	Energy production and conversion genes
	4	Cj0451	rep		416985..417632	416985	417632	647	+	215	218562106	COG0036G	ribulose-phosphate 3-epimerase	G	Carbohydrate transport and metabolism genes
	4	Cj0506	alaS		469627..472155	469627	472155	2528	+	842	218562159	COG0013J	alanyl-tRNA synthetase	J	Translation
	4	Cj0665c	argG		621392..622612	621392	622612	1220	-	406	218562310	COG0137E	argininosuccinate synthase	E	Amino acid transport and metabolism genes
	4	Cj0680c	uvrB		633589..635562	633589	635562	1973	-	657	218562319	COG0556L	excinuclease ABC subunit B	L	Replication, recombination and repair
	4	Cj0696	ftsZ		653934..655046	653934	655046	1112	+	370	218562335	COG0206D	cell division protein FtsZ	D	Cell cycle control, mitosis and meiosis genes
	4	Cj0698	flgG		656043..656834	656043	656834	791	+	263	218562337	COG4786N	flagellar basal body rod protein FlgG	N	Cell motility genes
	4	Cj0699C	glnA		656901..658331	656901	658331	1430	-	476	218562338	COG0174E	glutamine synthetase	E	Amino acid transport and metabolism genes
	4	Cj0701	Cj0701		659226..660479	659226	660479	1253	+	417	218562340	COG0826O	putative protease	O	Posttranslational modification, protein turnover, chaperones genes
	4	Cj0709	ffh		665788..667125	665788	667125	1337	+	445	218562348	COG0541U	signal recognition particle protein	U	Intracellular trafficking and secretion genes
	4	Cj0759	dnaK		709183..711054	709183	711054	1871	+	623	218562387	COG0443O	molecular chaperone DnaK	O	Posttranslational modification, protein turnover, chaperones genes
	4	Cj0886C	ftsK		820683..823523	820683	823523	2840	-	946	218562506	COG1674D	putative cell division protein	D	Cell cycle control, mitosis and meiosis genes
	4	Cj0901	Cj0901		840763..841506	840763	841506	743	+	247	218562521	COG0765E	putative amino acid ABC tansporter permease	E	Amino acid transport and metabolism genes
	4	Cj0955c	purL		894780..896966	894780	896966	2186	-	728	218562574	COG0046F	phosphoribosylformylglycinamidine synthase II	F	Nucleotide transport and metabolism genes
	4	Cj0992c	hemN		923422..924777	923422	924777	1355	-	451	218562608	COG0635H	coproporphyrinogen III oxidase	H	Coenzyme transport and metabolism genes
	4	Cj0996	ribA		927210..927770	927210	927770	560	+	186	218562612	COG0807H	GTP cyclohydrolase II	H	Coenzyme transport and metabolism genes
	4	Cj1054C	murC		989562..990860	989562	990860	1298	-	432	218562670	COG0773M	UDP-N-acetylmuramate--L-alanine ligase	M	Cell wall/membrane biogenesis genes
	4	Cj1059C	gatA		995315..996676	995315	996676	1361	-	453	218562675	COG0154J	aspartyl/glutamyl-tRNA amidotransferase subunit A	J	Translation
	4	Cj1085C	mfd		1015629..1018565	1015629	1018565	2936	-	978	218562699	COG1197LK	transcription-repair coupling factor	K	Transcription
	4	Cj1229	cbpA		1157879..1158772	1157879	1158772	893	+	297	218562841	COG0484O	putative curved-DNA binding protein	O	Posttranslational modification, protein turnover, chaperones genes
	4	Cj1248	guaA		1176466..1178001	1176466	1178001	1535	+	511	218562860	COG0519F	GMP synthase	F	Nucleotide transport and metabolism genes
	4	Cj1253	pnp		1183594..1185753	1183594	1185753	2159	+	719	218562865	COG1185J	polynucleotide phosphorylase/polyadenylase	J	Translation
	4	Cj1260C	dnaJ		1190510..1191631	1190510	1191631	1121	-	373	218562872	COG0484O	chaperone protein DnaJ	O	Posttranslational modification, protein turnover, chaperones genes
	4	Cj1267C	hydA		1197214..1198353	1197214	1198353	1139	-	379	218562879	COG1740C	Ni/Fe-hydrogenase small chain	C	Energy production and conversion genes
	4	Cj1292	dcd		1224239..1224799	1224239	1224799	560	+	186	218562903	COG0717F	deoxycytidine triphosphate deaminase	F	Nucleotide transport and metabolism genes
	4	Cj1369	Cj1369		1306186..1307505	1306186	1307505	1319	+	439	218562978	COG2252R	putative permease	R	General function prediction only
	4	Cj1476C	Cj1476c		1409619..1413179	1409619	1413179	3560	-	1186	218563077	COG0674C	pyruvate-flavodoxin oxidoreductase	C	Energy production and conversion genes
	4	Cj1490C	ccoN		1424255..1425721	1424255	1425721	1466	-	488	218563091	COG3278O	cbb3-type cytochrome c oxidase subunit I	O	Posttranslational modification, protein turnover, chaperones genes
	4	Cj1494C	carA		1428394..1429512	1428394	1429512	1118	-	372	218563095	COG0505EF	carbamoyl phosphate synthase small subunit	E	Amino acid transport and metabolism genes
	4	Cj1529C	purM		1461504..1462493	1461504	1462493	989	-	329	218563122	COG0150F	phosphoribosylaminoimidazole synthetase	F	Nucleotide transport and metabolism genes
	4	Cj1535C	pgi		1466289..1467509	1466289	1467509	1220	-	406	218563128	COG0166G	glucose-6-phosphate isomerase	G	Carbohydrate transport and metabolism genes
	4	Cj1590	infA		1521957..1522175	1521957	1522175	218	+	72	218563179	COG0361J	translation initiation factor IF-1	J	Translation
	4	Cj1594	rpsD		1523258..1523884	1523258	1523884	626	+	208	218563183	COG0522J	30S ribosomal protein S4	J	Translation
	4	Cj1612	prfA		1538777..1539844	1538777	1539844	1067	+	355	218563201	COG0216J	peptide chain release factor 1	J	Translation
	4	Cj1710C	Cj1710c		1621696..1623690	1621696	1623690	1994	-	664	218563296	COG0595R	putative metallo-beta-lactamase family protein	R	General function prediction only
	3	Cj0066C	aroQ	Y	79257..79736	79257	79736	479	-	159	218561751	COG0757E	3-dehydroquinate dehydratase	E	Amino acid transport and metabolism genes
	3	Cj0087	aspA	Y	96074..97480	96074	97480	1406	+	468	218561768	COG1027E	aspartate ammonia-lyase	E	Amino acid transport and metabolism genes
	3	Cj0134	thrB	Y	135709..136587	135709	136587	878	+	292	218561815	COG0083E	homoserine kinase	E	Amino acid transport and metabolism genes
	3	Cj0187c	purN		182859..183425	182859	183425	566	-	188	218561866	COG0299F	phosphoribosylglycinamide formyltransferase	F	Nucleotide transport and metabolism genes
	3	Cj0268C	Cj0268c		246555..247643	246555	247643	1088	-	362	218561931	COG0330O	putative transmembrane protein	O	Posttranslational modification, protein turnover, chaperones genes
	3	Cj0283C	cheW		260378..260899	260378	260899	521	-	173	218561945	COG0835NT	chemotaxis protein	T	Signal transduction mechanisms genes
	3	Cj0294	Cj0294		269830..270489	269830	270489	659	+	219	218561953	COG1179H	putative MoeB/ThiF family protein	H	Coenzyme transport and metabolism genes
	3	Cj0316	pheA		286248..287321	286248	287321	1073	+	357	218561975	COG0077E	chorismate mutase/prephenate dehydratase	E	Amino acid transport and metabolism genes
	3	Cj0317	hisC		287311..288405	287311	288405	1094	+	364	218561976	COG0079E	histidinol-phosphate aminotransferase	E	Amino acid transport and metabolism genes
	3	Cj0325	xseA		296290..297453	296290	297453	1163	+	387	218561984	COG1570L	exodeoxyribonuclease VII large subunit	L	Replication, recombination and repair
	3	Cj0329C	plsX		299850..300836	299850	300836	986	-	328	218561988	COG0416I	putative glycerol-3-phosphate acyltransferase PlsX	I	Lipid transport and metabolism genes
	3	Cj0333c	fdxA		301892..302176	301892	302176	284	-	94	218561992	COG1142C	ferredoxin	C	Energy production and conversion genes
	3	Cj0338C	polA		305730..308369	305730	308369	2639	-	879	218561997	COG0749L	DNA polymerase I	L	Replication, recombination and repair
	3	Cj0360	glmM		327143..328480	327143	328480	1337	+	445	218562018	COG1109G	phosphoglucosamine mutase	G	Carbohydrate transport and metabolism genes
	3	Cj0369C	Cj0369c		337535..338911	337535	338911	1376	-	458	218562027	COG0348C	putative ferredoxin domain-containing integral membrane protein	C	Energy production and conversion genes
	3	Cj0384c	kdsA		349600..350415	349600	350415	815	-	271	218562042	COG2877M	2-dehydro-3-deoxyphosphooctonate aldolase	M	Cell wall/membrane biogenesis genes
	3	Cj0388	trpS		353309..354268	353309	354268	959	+	319	218562046	COG0180J	tryptophanyl-tRNA synthetase	J	Translation
	3	Cj0443	accA		411269..412207	411269	412207	938	+	312	218562101	COG0825I	acetyl-CoA carboxylase carboxyltransferase subunit alpha	I	Lipid transport and metabolism genes
	3	Cj0460	nusA		424131..425219	424131	425219	1088	+	362	218562115	COG0195K	transcription elongation factor NusA	K	Transcription
	3	Cj0464	recG		428752..430575	428752	430575	1823	+	607	218562119	COG1200LK	ATP-dependent DNA helicase RecG	K	Transcription
	3	Cj0512	purC		479091..479801	479091	479801	710	+	236	218562165	COG0152F	phosphoribosylaminoimidazole-succinocarboxamide synthase	F	Nucleotide transport and metabolism genes
	3	Cj0527C	flgC		489458..489952	489458	489952	494	-	164	218562179	COG1558N	flagellar basal body rod protein FlgC	N	Cell motility genes
	3	Cj0574	ilvI		534865..536565	534865	536565	1700	+	566	218562225	COG0028EH	acetolactate synthase 3 catalytic subunit	E	Amino acid transport and metabolism genes
	3	Cj0577C	queA		537977..539005	537977	539005	1028	-	342	218562228	COG0809J	S-adenosylmethionine:tRNA ribosyltransferase-isomerase	J	Translation
	3	Cj0632	ilvC		594548..595570	594548	595570	1022	+	340	218562282	COG0059EH	ketol-acid reductoisomerase	E	Amino acid transport and metabolism genes
	3	Cj0640c	aspS		600484..602235	600484	602235	1751	-	583	218562290	COG0173J	aspartyl-tRNA synthetase	J	Translation
	3	Cj0667	Cj0667		622768..623013	622768	623013	245	+	81	218562311	COG1188J	putative S4 domain protein	J	Translation
	3	Cj0688	pta		641890..643395	641890	643395	1505	+	501	218562327	COG0280C	putative phosphate acetyltransferase	C	Energy production and conversion genes
	3	Cj0689	ackA		643409..644599	643409	644599	1190	+	396	218562328	COG0282C	acetate kinase	C	Energy production and conversion genes
	3	Cj0695	ftsA		652530..653918	652530	653918	1388	+	462	218562334	COG0849D	cell division protein FtsA	D	Cell cycle control, mitosis and meiosis genes
	3	Cj0697	flgG2		655202..656014	655202	656014	812	+	270	218562336	COG4786N	flagellar basal-body rod protein	N	Cell motility genes
	3	Cj0702	purE		660480..660974	660480	660974	494	+	164	218562341	COG0041F	phosphoribosylaminoimidazole carboxylase catalytic subunit	F	Nucleotide transport and metabolism genes
	3	Cj0716	Cj0716		669832..671172	669832	671172	1340	+	446	218562355	COG3200E	putative phospho-2-dehydro-3-deoxyheptonate aldolase	E	Amino acid transport and metabolism genes
	3	Cj0718	dnaE		671946..675548	671946	675548	3602	+	1200	218562357	COG0587L	DNA polymerase III subunit alpha	L	Replication, recombination and repair
	3	Cj0764c	speA		714777..716612	714777	716612	1835	-	611	218562392	COG1166E	arginine decarboxylase	E	Amino acid transport and metabolism genes
	3	Cj0765c	hisS		716609..717835	716609	717835	1226	-	408	218562393	COG0124J	histidyl-tRNA synthetase	J	Translation
	3	Cj0766c	tmk		717832..718410	717832	718410	578	-	192	218562394	COG0125F	thymidylate kinase	F	Nucleotide transport and metabolism genes
	3	Cj0767c	coaD		718401..718877	718401	718877	476	-	158	218562395	COG0669H	phosphopantetheine adenylyltransferase	H	Coenzyme transport and metabolism genes
	3	Cj0775c	valS		724714..727326	724714	727326	2612	-	870	218562403	COG0525J	valyl-tRNA synthetase	J	Translation
	3	Cj0780	napA		732179..734953	732179	734953	2774	+	924	218562408	COG0243C	nitrate reductase catalytic subunit	C	Energy production and conversion genes
	3	Cj0798c	ddl		748257..749297	748257	749297	1040	-	346	218562426	COG1181M	D-alanyl-alanine synthetase A	M	Cell wall/membrane biogenesis genes
	3	Cj0799c	ruvA		749307..749858	749307	749858	551	-	183	218562427	COG0632L	Holliday junction DNA helicase RuvA	L	Replication, recombination and repair
	3	Cj0803	msbA		754629..756371	754629	756371	1742	+	580	218562431	COG1132V	lipid export ABC transport protein	V	Defense mechanisms genes
	3	Cj0804	pyrD		756403..757461	756403	757461	1058	+	352	218562432	COG0167F	dihydroorotate dehydrogenase 2	F	Nucleotide transport and metabolism genes
	3	Cj0806	dapA		758701..759597	758701	759597	896	+	298	218562434	COG0329EM	dihydrodipicolinate synthase	M	Cell wall/membrane biogenesis genes
	3	Cj0810	nadE		761404..762144	761404	762144	740	+	246	218562438	COG0171H	NAD synthetase	H	Coenzyme transport and metabolism genes
	3	Cj0812	thrC		763071..764483	763071	764483	1412	+	470	218562440	COG0498E	threonine synthase	E	Amino acid transport and metabolism genes
	3	Cj0813	kdsB		764480..765199	764480	765199	719	+	239	218562441	COG1212M	3-deoxy-manno-octulosonate cytidylyltransferase	M	Cell wall/membrane biogenesis genes
	3	Cj0821	glmU		768906..770195	768906	770195	1289	+	429	218562449	COG1207M	bifunctional N-acetylglucosamine-1-phosphate uridyltransferase/glucosamine-1-phosphate acetyltransferase	M	Cell wall/membrane biogenesis genes
	3	Cj0828c	ilvA		775149..776360	775149	776360	1211	-	403	218562456	COG1171E	threonine dehydratase	E	Amino acid transport and metabolism genes
	3	Cj0838C	metG		786119..788005	786119	788005	1886	-	628	218562466	COG0143J	methionyl-tRNA synthetase	J	Translation
	3	Cj0929	pepA		862213..863664	862213	863664	1451	+	483	218562548	COG0260E	leucyl aminopeptidase	E	Amino acid transport and metabolism genes
	3	Cj0932c	pckA		866178..867752	866178	867752	1574	-	524	218562551	COG1866C	phosphoenolpyruvate carboxykinase	C	Energy production and conversion genes
	3	Cj0957c	Cj0957c		898298..899116	898298	899116	818	-	272	218562576	-	hypothetical protein Cj0957c	X	Not assigned to COGs
	3	Cj0958c	Cj0958c		899120..900706	899120	900706	1586	-	528	218562577	COG0706U	putative inner membrane protein translocase component YidC	U	Intracellular trafficking and secretion genes
	3	Cj0993C	Cj0993c		924764..925255	924764	925255	491	-	163	218562609	-	hypothetical protein Cj0993c	X	Not assigned to COGs
	3	Cj1001	rpoD		931191..933059	931191	933059	1868	+	622	218562617	COG0568K	RNA polymerase sigma factor RpoD	K	Transcription
	3	Cj1006c	Cj1006c		936246..937496	936246	937496	1250	-	416	218562622	COG0621J	putative MiaB-like tRNA modifying enzyme	J	Translation
	3	Cj1007c	Cj1007c		937493..939064	937493	939064	1571	-	523	218562623	COG0668M	putative mechanosensitive ion channel family protein	M	Cell wall/membrane biogenesis genes
	3	Cj1008c	aroB		939061..940116	939061	940116	1055	-	351	218562624	COG0337E	3-dehydroquinate synthase	E	Amino acid transport and metabolism genes
	3	Cj1010	tgt		941592..942713	941592	942713	1121	+	373	218562626	COG0343J	queuine tRNA-ribosyltransferase	J	Translation
	3	Cj1023c	asd		954238..955269	954238	955269	1031	-	343	218562639	COG0136E	aspartate-semialdehyde dehydrogenase	E	Amino acid transport and metabolism genes
	3	Cj1044C	thiH		977626..978771	977626	978771	1145	-	381	218562660	COG1060HR	thiamine biosynthesis protein ThiH	H	Coenzyme transport and metabolism genes
	3	Cj1045C	thiG		978774..979550	978774	979550	776	-	258	218562661	COG2022H	thiazole synthase	H	Coenzyme transport and metabolism genes
	3	Cj1058C	guaB		993848..995305	993848	995305	1457	-	485	218562674	COG0516F	inosine 5'-monophosphate dehydrogenase	F	Nucleotide transport and metabolism genes
	3	Cj1114C	pssA		1046471..1047199	1046471	1047199	728	-	242	218562728	COG1183I	CDP-diacylglycerol--serine O-phosphatidyltransferase	I	Lipid transport and metabolism genes
	3	Cj1116c	ftsH		1047823..1049760	1047823	1049760	1937	-	645	218562730	COG0465O	membrane bound zinc metallopeptidase	O	Posttranslational modification, protein turnover, chaperones genes
	3	Cj1120c	pglF		1052030..1053802	1052030	1053802	1772	-	590	218562734	COG1086MG	UDP-GlcNAc C4,6 dehydratase	M	Cell wall/membrane biogenesis genes
	3	Cj1230	hspR		1158788..1159162	1158788	1159162	374	+	124	218562842	COG0789K	heat shock transcriptional regulator	K	Transcription
	3	Cj1261	racR		1191788..1192459	1191788	1192459	671	+	223	218562873	COG0745TK	two-component regulator	K	Transcription
	3	Cj1270C	Cj1270c		1202291..1203382	1202291	1203382	1091	-	363	218562882	COG2070R	putative 2-nitropropane dioxygenase,oxidoreductase protein	R	General function prediction only
	3	Cj1290c	accC		1222303..1223634	1222303	1223634	1331	-	443	218562901	COG0439I	biotin carboxylase	I	Lipid transport and metabolism genes
	3	Cj1344C	Cj1344c		1276451..1277458	1276451	1277458	1007	-	335	218562953	COG0533O	putative DNA-binding/iron metalloprotein/AP endonuclease	O	Posttranslational modification, protein turnover, chaperones genes
	3	Cj1368	Cj1368		1305112..1306176	1305112	1306176	1064	+	354	218562977	COG1060HR	hypothetical protein Cj1368	H	Coenzyme transport and metabolism genes
	3	Cj1384C	Cj1384c		1322041..1322355	1322041	1322355	314	-	104	218562993	COG4378S	hypothetical protein Cj1384c	S	Function unknown genes
	3	Cj1454c	Cj1454c		1391201..1392520	1391201	1392520	1319	-	439	218563057	COG0621J	putative radical SAM domain family protein	J	Translation
	3	Cj1455	prfB		1392594..1393691	1392594	1393691	1097	+	365	218563058	COG1186J	peptide chain release factor 2	J	Translation
	3	Cj1489c	ccoO		1423577..1424242	1423577	1424242	665	-	221	218563090	COG2993C	cbb3-type cytochrome c oxidase subunit II	C	Energy production and conversion genes
	3	Cj1493C	Cj1493c		1427738..1428397	1427738	1428397	659	-	219	218563094	COG2836S	putative integral membrane protein	S	Function unknown genes
	3	Cj1536C	galU		1467503..1468327	1467503	1468327	824	-	274	218563129	COG1210M	UTP--glucose-1-phosphate uridylyltransferase	M	Cell wall/membrane biogenesis genes
	3	Cj1591	rpmJ		1522347..1522460	1522347	1522460	113	+	37	218563180	-	50S ribosomal protein L36	X	Not assigned to COGs
	3	Cj1592	rpsM		1522463..1522828	1522463	1522828	365	+	121	218563181	COG0099J	30S ribosomal protein S13	J	Translation
	3	Cj1593	rpsK		1522838..1523230	1522838	1523230	392	+	130	218563182	COG0100J	30S ribosomal protein S11	J	Translation
	3	Cj1595	rpoA		1523897..1524910	1523897	1524910	1013	+	337	218563184	COG0202K	DNA-directed RNA polymerase subunit alpha	K	Transcription
	3	Cj1606c	mrp		1533545..1534651	1533545	1534651	1106	-	368	218563195	COG0489D	putative ATP/GTP-binding protein	D	Cell cycle control, mitosis and meiosis genes
	3	Cj1607	ispDF		1534774..1535889	1534774	1535889	1115	+	371	218563196	COG0245I	bifunctional 2-C-methyl-D-erythritol 4-phosphate cytidylyltransferase/2-C-methyl-D-erythritol 2,4-cyclodiphosphate synthase protein	I	Lipid transport and metabolism genes
	3	Cj1644	ispA		1568334..1569179	1568334	1569179	845	+	281	218563233	COG0142H	geranyltranstransferase	H	Coenzyme transport and metabolism genes
	3	Cj1645	tkt		1569190..1571088	1569190	1571088	1898	+	632	218563234	COG0021G	transketolase	G	Carbohydrate transport and metabolism genes
	3	Cj1673C	recA		1593765..1594796	1593765	1594796	1031	-	343	218563261	COG0468L	recombinase A	L	Replication, recombination and repair
	3	Cj1674	Cj1674		1594902..1595762	1594902	1595762	860	+	286	218563262	COG2107R	hypothetical protein Cj1674	R	General function prediction only
	2	Cj0060c	fliM	Y	74331..75410	74331	75410	1079	-	359	218561745	COG1868N	flagellar motor switch protein FliM	N	Cell motility genes
	2	Cj0061c	fliA	Y	75410..76126	75410	76126	716	-	238	218561746	COG1191K	flagellar biosynthesis sigma factor	K	Transcription
	2	Cj0062c	Cj0062c	Y	76083..76439	76083	76439	356	-	118	218561747	-	putative integral membrane protein	X	Not assigned to COGs
	2	Cj0063c	Cj0063c	Y	76458..77324	76458	77324	866	-	288	218561748	COG0455D	putative ATP-binding protein	D	Cell cycle control, mitosis and meiosis genes
	2	Cj0067	Cj0067	Y	79827..81056	79827	81056	1229	+	409	218561752	COG0402FR	chlorohydrolase	F	Nucleotide transport and metabolism genes
	2	Cj0068	pspA	Y	81044..81940	81044	81940	896	+	298	218561753	COG0616OU	protease	U	Intracellular trafficking and secretion genes
	2	Cj0088	dcuA	Y	97496..98833	97496	98833	1337	+	445	218561769	COG2704R	anaerobic C4-dicarboxylate transporter	R	General function prediction only
	2	Cj0105	atpA	Y	111488..112993	111488	112993	1505	+	501	218561786	COG0056C	F0F1 ATP synthase subunit alpha	C	Energy production and conversion genes
	2	Cj0115	slyD	Y	120194..120763	120194	120763	569	+	189	218561796	COG1047O	FKBP-type peptidyl-prolyl cis-trans isomerase	O	Posttranslational modification, protein turnover, chaperones genes
	2	Cj0116	fabD	Y	120763..121683	120763	121683	920	+	306	218561797	COG0331I	malonyl CoA-acyl carrier protein transacylase	I	Lipid transport and metabolism genes
	2	Cj0118	Cj0118	Y	122366..123121	122366	123121	755	+	251	218561799	COG0037D	hypothetical protein Cj0118	D	Cell cycle control, mitosis and meiosis genes
	2	Cj0135	Cj0135	Y	136612..136869	136612	136869	257	+	85	218561816	COG2740K	hypothetical protein Cj0135	K	Transcription
	2	Cj0137	rbfA	Y	139468..139830	139468	139830	362	+	120	218561818	COG0858J	ribosome-binding factor A	J	Translation
	2	Cj0138	Cj0138	Y	139820..140242	139820	140242	422	+	140	218561819	COG0779S	hypothetical protein Cj0138	S	Function unknown genes
	2	Cj0022C	Cj0022c		27402..28304	27402	28304	902	-	300	218561715	COG0564J	putative ribosomal pseudouridine synthase	J	Translation
	2	Cj0027	pyrG		34382..36013	34382	36013	1631	+	543	218561720	COG0504F	CTP synthetase	F	Nucleotide transport and metabolism genes
	2	Cj0028	recJ		36000..37571	36000	37571	1571	+	523	218561721	COG0608L	putative single-stranded-DNA-specific exonuclease	L	Replication, recombination and repair
	2	Cj0147c	trxA		151710..152024	151710	152024	314	-	104	218561828	COG3118O	thioredoxin	O	Posttranslational modification, protein turnover, chaperones genes
	2	Cj0150C	Cj0150c		153670..154872	153670	154872	1202	-	400	218561831	COG0436E	aspartate aminotransferase	E	Amino acid transport and metabolism genes
	2	Cj0172C	Cj0172c		167807..169012	167807	169012	1205	-	401	218561851	COG1748E	putative saccharopine dehydrogenase	E	Amino acid transport and metabolism genes
	2	Cj0182	Cj0182		177995..179200	177995	179200	1205	+	401	218561861	COG1133I	putative transporter	I	Lipid transport and metabolism genes
	2	Cj0183	Cj0183		179299..180657	179299	180657	1358	+	452	218561862	COG1253R	putative integral membrane protein	R	General function prediction only
	2	Cj0188c	Cj0188c		183416..184786	183416	184786	1370	-	456	218561867	COG0063G	putative kinase	G	Carbohydrate transport and metabolism genes
	2	Cj0190c	Cj0190c		185470..186975	185470	186975	1505	-	501	218561869	COG0606O	hypothetical protein Cj0190c	O	Posttranslational modification, protein turnover, chaperones genes
	2	Cj0193c	tig		188119..189453	188119	189453	1334	-	444	218561872	COG0544O	trigger factor	O	Posttranslational modification, protein turnover, chaperones genes
	2	Cj0231C	nrdF		215417..216439	215417	216439	1022	-	340	218561895	COG0208F	ribonucleotide-diphosphate reductase subunit beta	F	Nucleotide transport and metabolism genes
	2	Cj0240C	iscS		222897..224078	222897	224078	1181	-	393	218561904	COG1104E	cysteine desulfurase	E	Amino acid transport and metabolism genes
	2	Cj0276	mreB		253049..254089	253049	254089	1040	+	346	218561939	COG1077D	rod shape-determining protein MreB	D	Cell cycle control, mitosis and meiosis genes
	2	Cj0277	mreC		254079..254828	254079	254828	749	+	249	218561940	COG1792M	rod shape-determining protein MreC	M	Cell wall/membrane biogenesis genes
	2	Cj0281C	tal		258778..259755	258778	259755	977	-	325	218561943	COG0176G	transaldolase	G	Carbohydrate transport and metabolism genes
	2	Cj0285c	cheV		263217..264173	263217	264173	956	-	318	218561947	COG0835NT	chemotaxis protein	T	Signal transduction mechanisms genes
	2	Cj0286c	Cj0286c		264166..264783	264166	264783	617	-	205	218561948	COG2908S	hypothetical protein Cj0286c	S	Function unknown genes
	2	Cj0311	Cj0311		282101..282637	282101	282637	536	+	178	218561970	COG1825J	50S ribosomal protein L25/general stress protein Ctc	J	Translation
	2	Cj0312	pth		282634..283179	282634	283179	545	+	181	218561971	COG0193J	peptidyl-tRNA hydrolase	J	Translation
	2	Cj0318	fliF		288457..290139	288457	290139	1682	+	560	218561977	COG1766NU	flagellar MS-ring protein	N	Cell motility genes
	2	Cj0321	dxs		291998..293845	291998	293845	1847	+	615	218561980	COG1154HI	1-deoxy-D-xylulose-5-phosphate synthase	H	Coenzyme transport and metabolism genes
	2	Cj0330c	rpmF		300842..300988	300842	300988	146	-	48	218561989	COG0333J	50S ribosomal protein L32	J	Translation
	2	Cj0331c	Cj0331c		301012..301365	301012	301365	353	-	117	218561990	-	hypothetical protein Cj0331c	X	Not assigned to COGs
	2	Cj0332c	ndk		301366..301779	301366	301779	413	-	137	218561991	COG0105F	nucleoside diphosphate kinase	F	Nucleotide transport and metabolism genes
	2	Cj0342c	uvrA		311302..314127	311302	314127	2825	-	941	218562001	COG0178L	excinuclease ABC subunit A	L	Replication, recombination and repair
	2	Cj0371	Cj0371		339403..340008	339403	340008	605	+	201	218562029	-	hypothetical protein Cj0371	X	Not assigned to COGs
	2	Cj0372	Cj0372		340018..341187	340018	341187	1169	+	389	218562030	COG0754E	putative glutathionylspermidine synthase	E	Amino acid transport and metabolism genes
	2	Cj0387	aroK		352815..353312	352815	353312	497	+	165	218562045	COG0703E	shikimate kinase	E	Amino acid transport and metabolism genes
	2	Cj0400	fur		365243..365716	365243	365716	473	+	157	218562058	COG0735P	ferric uptake regulator	P	Inorganic ion transport and metabolism genes
	2	Cj0401	lysS		365717..367222	365717	367222	1505	+	501	218562059	COG1190J	lysyl-tRNA synthetase	J	Translation
	2	Cj0402	glyA		367219..368463	367219	368463	1244	+	414	218562060	COG0112E	serine hydroxymethyltransferase	E	Amino acid transport and metabolism genes
	2	Cj0403	Cj0403		368460..369005	368460	369005	545	+	181	218562061	-	hypothetical protein Cj0403	X	Not assigned to COGs
	2	Cj0405	aroE		369852..370640	369852	370640	788	+	262	218562063	COG0169E	shikimate 5-dehydrogenase	E	Amino acid transport and metabolism genes
	2	Cj0410	frdB		375339..376064	375339	376064	725	+	241	218562068	COG0479C	fumarate reductase iron-sulfur subunit	C	Energy production and conversion genes
	2	Cj0442	fabF		410053..411267	410053	411267	1214	+	404	218562100	COG0304IQ	3-oxoacyl-(acyl carrier protein) synthase II	I	Lipid transport and metabolism genes
	2	Cj0470	tuf		434408..435607	434408	435607	1199	+	399	218562125	COG0050J	elongation factor Tu	J	Translation
	2	Cj0478	rpoB		438992..443128	438992	443128	4136	+	1378	218562133	COG0085K	DNA-directed RNA polymerase subunit beta	K	Transcription
	2	Cj0479	rpoC		443121..447674	443121	447674	4553	+	1517	218562134	COG0086K	DNA-directed RNA polymerase subunit beta'	K	Transcription
	2	Cj0508	pbpA		472703..474634	472703	474634	1931	+	643	218562161	COG0744M	penicillin-binding protein	M	Cell wall/membrane biogenesis genes
	2	Cj0511	Cj0511		477755..479089	477755	479089	1334	+	444	218562164	COG0793M	putative secreted protease	M	Cell wall/membrane biogenesis genes
	2	Cj0513	purS		479810..480055	479810	480055	245	+	81	218562166	COG1828F	phosphoribosylformylglycinamidine synthase	F	Nucleotide transport and metabolism genes
	2	Cj0514	purQ		480057..480728	480057	480728	671	+	223	218562167	COG0047F	phosphoribosylformylglycinamidine synthase I	F	Nucleotide transport and metabolism genes
	2	Cj0518	htpG		483003..484829	483003	484829	1826	+	608	218562171	COG0326O	heat shock protein 90	O	Posttranslational modification, protein turnover, chaperones genes
	2	Cj0526C	fliE		489155..489451	489155	489451	296	-	98	218562178	COG1677NU	flagellar hook-basal body protein FliE	N	Cell motility genes
	2	Cj0528C	flgB		489962..490393	489962	490393	431	-	143	218562180	COG1815N	flagellar basal body rod protein FlgB	N	Cell motility genes
	2	Cj0535	oorD		499238..499549	499238	499549	311	+	103	218562187	COG1146C	2-oxoglutarate-acceptor oxidoreductase subunit OorD	C	Energy production and conversion genes
	2	Cj0536	oorA		499558..500682	499558	500682	1124	+	374	218562188	COG0674C	2-oxoglutarate-acceptor oxidoreductase subunit OorA	C	Energy production and conversion genes
	2	Cj0542	hemA		503930..505228	503930	505228	1298	+	432	218562194	COG0373H	glutamyl-tRNA reductase	H	Coenzyme transport and metabolism genes
	2	Cj0543	proS		505212..506921	505212	506921	1709	+	569	218562195	COG0442J	prolyl-tRNA synthetase	J	Translation
	2	Cj0545	hemC		507304..508227	507304	508227	923	+	307	218562197	COG0181H	porphobilinogen deaminase	H	Coenzyme transport and metabolism genes
	2	Cj0575	ilvH		536562..537026	536562	537026	464	+	154	218562226	COG0440E	acetolactate synthase 3 regulatory subunit	E	Amino acid transport and metabolism genes
	2	Cj0576	lpxD		537023..537988	537023	537988	965	+	321	218562227	COG1044M	UDP-3-O-	M	Cell wall/membrane biogenesis genes
	2	Cj0578c	tatC		538998..539735	538998	539735	737	-	245	218562229	COG0805U	sec-independent protein translocase	U	Intracellular trafficking and secretion genes
	2	Cj0582	lysC		541843..543045	541843	543045	1202	+	400	218562233	COG0527E	aspartate kinase	E	Amino acid transport and metabolism genes
	2	Cj0583	Cj0583		543046..543582	543046	543582	536	+	178	218562234	-	hypothetical protein Cj0583	X	Not assigned to COGs
	2	Cj0586	ligA		545332..547275	545332	547275	1943	+	647	218562237	COG0272L	NAD-dependent DNA ligase LigA	L	Replication, recombination and repair
	2	Cj0590	Cj0590		549825..550535	549825	550535	710	+	236	218562241	COG4106R	putative SAM-dependent methyltransferase	R	General function prediction only
	2	Cj0598	Cj0598		555212..556654	555212	556654	1442	+	480	218562249	COG4372S	hypothetical protein Cj0598	S	Function unknown genes
	2	Cj0599	Cj0599		556651..557604	556651	557604	953	+	317	218562250	COG2885M	putative OmpA family membrane protein	M	Cell wall/membrane biogenesis genes
	2	Cj0623	hypB		584094..584837	584094	584837	743	+	247	218562274	COG0378OK	hydrogenase isoenzymes formation protein	K	Transcription
	2	Cj0627	hypA		587164..587508	587164	587508	344	+	114	218562278	COG0375R	hydrogenase expression/formation protein	R	General function prediction only
	2	Cj0638C	ppa		599381..599899	599381	599899	518	-	172	218562288	COG0221C	inorganic pyrophosphatase	C	Energy production and conversion genes
	2	Cj0639C	adk		599909..600487	599909	600487	578	-	192	218562289	COG0563F	adenylate kinase	F	Nucleotide transport and metabolism genes
	2	Cj0644	Cj0644		606050..606865	606050	606865	815	+	271	218562294	COG0084L	putative TatD-related deoxyribonuclease protein	L	Replication, recombination and repair
	2	Cj0663c	hslV		620394..620936	620394	620936	542	-	180	218562308	COG5405O	ATP-dependent protease peptidase subunit	O	Posttranslational modification, protein turnover, chaperones genes
	2	Cj0664C	rplI		620936..621379	620936	621379	443	-	147	218562309	COG0359J	50S ribosomal protein L9	J	Translation
	2	Cj0668	Cj0668		623010..623417	623010	623417	407	+	135	218562312	COG0802R	putative ATP/GTP-binding protein	R	General function prediction only
	2	Cj0669	Cj0669		623410..624138	623410	624138	728	+	242	218562313	COG1137R	ABC-transporter ATP-binding protein	R	General function prediction only
	2	Cj0686	ispG		639998..641071	639998	641071	1073	+	357	218562325	COG0821I	4-hydroxy-3-methylbut-2-en-1-yl diphosphate synthase	I	Lipid transport and metabolism genes
	2	Cj0700	Cj0700		658534..659229	658534	659229	695	+	231	218562339	-	hypothetical protein Cj0700	X	Not assigned to COGs
	2	Cj0703	Cj0703		660984..661520	660984	661520	536	+	178	218562342	-	hypothetical protein Cj0703	X	Not assigned to COGs
	2	Cj0704	glyQ		661532..662395	661532	662395	863	+	287	218562343	COG0752J	glycyl-tRNA synthetase subunit alpha	J	Translation
	2	Cj0705	Cj0705		662382..663107	662382	663107	725	+	241	218562344	COG0327S	hypothetical protein Cj0705	S	Function unknown genes
	2	Cj0706	Cj0706		663117..663833	663117	663833	716	+	238	218562345	COG1579R	hypothetical protein Cj0706	R	General function prediction only
	2	Cj0707	kdtA		663830..664987	663830	664987	1157	+	385	218562346	COG1519M	3-deoxy-D-manno-octulosonic-acid transferase	M	Cell wall/membrane biogenesis genes
	2	Cj0708	Cj0708		664968..665720	664968	665720	752	+	250	218562347	COG0564J	putative ribosomal pseudouridine synthase	J	Translation
	2	Cj0762c	aspB		712797..713966	712797	713966	1169	-	389	218562390	COG0436E	aspartate aminotransferase	E	Amino acid transport and metabolism genes
	2	Cj0781	napG		734971..735711	734971	735711	740	+	246	218562409	COG0437C	quinol dehydrogenase periplasmic component	C	Energy production and conversion genes
	2	Cj0782	napH		735708..736490	735708	736490	782	+	260	218562410	COG0348C	quinol dehydrogenase membrane component	C	Energy production and conversion genes
	2	Cj0783	napB		736487..737011	736487	737011	524	+	174	218562411	COG3043C	periplasmic nitrate reductase small subunit	C	Energy production and conversion genes
	2	Cj0795C	murF		745833..747260	745833	747260	1427	-	475	218562423	COG0770M	UDP-N-acetylmuramoyl-tripeptide D-alanyl-D-alanine ligase	M	Cell wall/membrane biogenesis genes
	2	Cj0800C	Cj0800c		749834..751693	749834	751693	1859	-	619	218562428	-	putative ATPase	X	Not assigned to COGs
	2	Cj0802	cysS		753248..754636	753248	754636	1388	+	462	218562430	COG0215J	cysteinyl-tRNA synthetase	J	Translation
	2	Cj0805	Cj0805		757458..758708	757458	758708	1250	+	416	218562433	COG0612R	putative zinc protease	R	General function prediction only
	2	Cj0807	Cj0807		759597..760376	759597	760376	779	+	259	218562435	COG1028IQR	7-alpha-hydroxysteroid dehydrogenase	I	Lipid transport and metabolism genes
	2	Cj0820c	fliP		768029..768763	768029	768763	734	-	244	218562448	COG1338NU	flagellar biosynthesis protein FliP	N	Cell motility genes
	2	Cj0826	Cj0826		773405..774430	773405	774430	1025	+	341	218562454	COG0795R	putative integral membrane protein	R	General function prediction only
	2	Cj0853C	hemL		799647..800921	799647	800921	1274	-	424	218562481	COG0001H	glutamate-1-semialdehyde aminotransferase	H	Coenzyme transport and metabolism genes
	2	Cj0855	folD		801345..802193	801345	802193	848	+	282	218562483	COG0190H	bifunctional 5,10-methylene-tetrahydrofolate dehydrogenase/ 5,10-methylene-tetrahydrofolate cyclohydrolase	H	Coenzyme transport and metabolism genes
	2	Cj0858C	murA		804230..805486	804230	805486	1256	-	418	218562486	COG0766M	UDP-N-acetylglucosamine 1-carboxyvinyltransferase	M	Cell wall/membrane biogenesis genes
	2	Cj0882c	flhA		817579..819753	817579	819753	2174	-	724	218562503	COG1298NU	flagellar biosynthesis protein FlhA	N	Cell motility genes
	2	Cj0893C	rpsA		832203..833873	832203	833873	1670	-	556	218562513	COG0539J	30S ribosomal protein S1	J	Translation
	2	Cj0896C	pheT		836111..838432	836111	838432	2321	-	773	218562516	COG0072J	phenylalanyl-tRNA synthetase subunit beta	J	Translation
	2	Cj0902	glnQ		841499..842227	841499	842227	728	+	242	218562522	COG1126E	putative glutamine transport ATP-binding protein	E	Amino acid transport and metabolism genes
	2	Cj0918c	prsA		854637..855566	854637	855566	929	-	309	218562537	COG0462FE	ribose-phosphate pyrophosphokinase	E	Amino acid transport and metabolism genes
	2	Cj0925	rpiB		860287..860724	860287	860724	437	+	145	218562544	COG0698G	ribose 5-phosphate isomerase	G	Carbohydrate transport and metabolism genes
	2	Cj0926	Cj0926		860724..861056	860724	861056	332	+	110	218562545	-	hypothetical protein Cj0926	X	Not assigned to COGs
	2	Cj0927	apt		861053..861601	861053	861601	548	+	182	218562546	COG0503F	adenine phosphoribosyltransferase	F	Nucleotide transport and metabolism genes
	2	Cj0928	Cj0928		861620..862216	861620	862216	596	+	198	218562547	COG0586S	putative integral membrane protein	S	Function unknown genes
	2	Cj0941c	Cj0941c		879636..880841	879636	880841	1205	-	401	218562560	COG4591M	putative permease	M	Cell wall/membrane biogenesis genes
	2	Cj0942c	secA		880838..883426	880838	883426	2588	-	862	218562561	COG0653U	preprotein translocase subunit SecA	U	Intracellular trafficking and secretion genes
	2	Cj0947c	Cj0947c		887526..888398	887526	888398	872	-	290	218562566	COG0388R	putative carbon-nitrogen hydrolase	R	General function prediction only
	2	Cj0953c	purH		892478..894010	892478	894010	1532	-	510	218562572	COG0138F	bifunctional phosphoribosylaminoimidazolecarboxamide formyltransferase/IMP cyclohydrolase	F	Nucleotide transport and metabolism genes
	2	Cj0956c	trmE		896977..898305	896977	898305	1328	-	442	218562575	COG0486R	tRNA modification GTPase TrmE	R	General function prediction only
	2	Cj0960c	rnpA		901041..901367	901041	901367	326	-	108	218562579	COG0594J	ribonuclease P protein component	J	Translation
	2	Cj1005C	Cj1005c		934626..936242	934626	936242	1616	-	538	218562621	COG0465O	putative membrane bound ATPase	O	Posttranslational modification, protein turnover, chaperones genes
	2	Cj1037C	pycA		970315..971760	970315	971760	1445	-	481	218562653	COG4770I	acetyl-CoA carboxylase subunit A	I	Lipid transport and metabolism genes
	2	Cj1046c	moeB		979553..980356	979553	980356	803	-	267	218562662	COG1179H	thiamine biosynthesis protein ThiF	H	Coenzyme transport and metabolism genes
	2	Cj1048c	dapE		980554..981651	980554	981651	1097	-	365	218562664	COG0624E	succinyl-diaminopimelate desuccinylase	E	Amino acid transport and metabolism genes
	2	Cj1096C	metK		1029616..1030812	1029616	1030812	1196	-	398	218562710	COG0192H	S-adenosylmethionine synthetase	H	Coenzyme transport and metabolism genes
	2	Cj1097	Cj1097		1030953..1032176	1030953	1032176	1223	+	407	218562711	COG3633E	serine/threonine transporter SstT	E	Amino acid transport and metabolism genes
	2	Cj1099	Cj1099		1033077..1034798	1033077	1034798	1721	+	573	218562713	COG1164E	peptidase	E	Amino acid transport and metabolism genes
	2	Cj1121C	pglE		1053804..1054964	1053804	1054964	1160	-	386	218562735	COG0399M	UDP-4-keto-6-deoxy-GlcNAc C4 aminotransferase	M	Cell wall/membrane biogenesis genes
	2	Cj1156	rho		1088373..1089671	1088373	1089671	1298	+	432	218562768	COG1158K	transcription termination factor Rho	K	Transcription
	2	Cj1157	dnaX		1089675..1091204	1089675	1091204	1529	+	509	218562769	COG2812L	DNA polymerase III subunits gamma and tau	L	Replication, recombination and repair
	2	Cj1194	Cj1194		1122289..1123815	1122289	1123815	1526	+	508	218562806	COG0306P	putative phosphate permease	P	Inorganic ion transport and metabolism genes
	2	Cj1196C	gpsA		1125011..1125907	1125011	1125907	896	-	298	218562808	COG0240C	NAD(P)H-dependent glycerol-3-phosphate dehydrogenase	C	Energy production and conversion genes
	2	Cj1197C	gatB		1125904..1127322	1125904	1127322	1418	-	472	218562809	COG0064J	aspartyl/glutamyl-tRNA amidotransferase subunit B	J	Translation
	2	Cj1205C	radA		1134109..1135449	1134109	1135449	1340	-	446	218562817	COG1066O	DNA repair protein RadA	O	Posttranslational modification, protein turnover, chaperones genes
	2	Cj1206C	ftsY		1135449..1136315	1135449	1136315	866	-	288	218562818	COG0552U	putative signal recognition particle protein	U	Intracellular trafficking and secretion genes
	2	Cj1209	Cj1209		1137502..1139055	1137502	1139055	1553	+	517	218562821	COG1418R	phosphodiesterase	R	General function prediction only
	2	Cj1250	purD		1179787..1181037	1179787	1181037	1250	+	416	218562862	COG0151F	phosphoribosylamine--glycine ligase	F	Nucleotide transport and metabolism genes
	2	Cj1271C	tyrS		1203379..1204584	1203379	1204584	1205	-	401	218562883	COG0162J	tyrosyl-tRNA synthetase	J	Translation
	2	Cj1287c	Cj1287c		1218757..1219992	1218757	1219992	1235	-	411	218562898	COG0281C	malate oxidoreductase	C	Energy production and conversion genes
	2	Cj1288c	gltX		1219994..1221385	1219994	1221385	1391	-	463	218562899	COG0008J	glutamyl-tRNA synthetase	J	Translation
	2	Cj1346C	dxr		1278851..1279921	1278851	1279921	1070	-	356	218562955	COG0743I	1-deoxy-D-xylulose 5-phosphate reductoisomerase	I	Lipid transport and metabolism genes
	2	Cj1366c	glmS		1300819..1302615	1300819	1302615	1796	-	598	218562975	COG0449M	glucosamine--fructose-6-phosphate aminotransferase	M	Cell wall/membrane biogenesis genes
	2	Cj1401C	tpiA		1335474..1336145	1335474	1336145	671	-	223	218563005	COG0149G	triosephosphate isomerase	G	Carbohydrate transport and metabolism genes
	2	Cj1403C	gapA		1337347..1338345	1337347	1338345	998	-	332	218563007	COG0057G	glyceraldehyde 3-phosphate dehydrogenase	G	Carbohydrate transport and metabolism genes
	2	Cj1463	flgJ		1399514..1399855	1399514	1399855	341	+	113	218563066	-	hypothetical protein Cj1463	X	Not assigned to COGs
	2	Cj1466	flgK		1400602..1402428	1400602	1402428	1826	+	608	218563069	COG1256N	flagellar hook-associated protein FlgK	N	Cell motility genes
	2	Cj1467	Cj1467		1402445..1403209	1402445	1403209	764	+	254	218563070	-	hypothetical protein Cj1467	X	Not assigned to COGs
	2	Cj1479c	rpsI		1414997..1415386	1414997	1415386	389	-	129	218563080	COG0103J	30S ribosomal protein S9	J	Translation
	2	Cj1480c	rplM		1415389..1415814	1415389	1415814	425	-	141	218563081	COG0102J	50S ribosomal protein L13	J	Translation
	2	Cj1487c	ccoP		1422446..1423309	1422446	1423309	863	-	287	218563088	COG2010C	cb-type cytochrome C oxidase subunit III	C	Energy production and conversion genes
	2	Cj1495c	Cj1495c		1429512..1430063	1429512	1430063	551	-	183	218563096	COG2952S	hypothetical protein Cj1495c	S	Function unknown genes
	2	Cj1498C	purA		1431092..1432342	1431092	1432342	1250	-	416	218563099	COG0104F	adenylosuccinate synthetase	F	Nucleotide transport and metabolism genes
	2	Cj1515C	Cj1515c		1450328..1451476	1450328	1451476	1148	-	382	218563114	COG0019E	putative decarboxylase	E	Amino acid transport and metabolism genes
	2	Cj1596	rplQ		1524914..1525267	1524914	1525267	353	+	117	218563185	COG0203J	50S ribosomal protein L17	J	Translation
	2	Cj1672c	eno		1592521..1593765	1592521	1593765	1244	-	414	218563260	COG0148G	phosphopyruvate hydratase	G	Carbohydrate transport and metabolism genes
	2	Cj1675	fliQ		1595774..1596043	1595774	1596043	269	+	89	218563263	COG1987NU	flagellar biosynthesis protein FliQ	N	Cell motility genes
	2	Cj1689C	rplO		1612221..1612613	1612221	1612613	392	-	130	218563275	COG0200J	50S ribosomal protein L15	J	Translation
	2	Cj1691C	rplR		1613073..1613429	1613073	1613429	356	-	118	218563277	COG0256J	50S ribosomal protein L18	J	Translation
	2	Cj1694C	rpsN		1614459..1614644	1614459	1614644	185	-	61	218563280	COG0199J	30S ribosomal protein S14	J	Translation
	2	Cj1695C	rplE		1614646..1615191	1614646	1615191	545	-	181	218563281	COG0094J	50S ribosomal protein L5	J	Translation
	2	Cj1704C	rplB		1618077..1618907	1618077	1618907	830	-	276	218563290	COG0090J	50S ribosomal protein L2	J	Translation
	2	Cj1705C	rplW		1618909..1619190	1618909	1619190	281	-	93	218563291	COG0089J	50S ribosomal protein L23	J	Translation
	2	Cj1707C	rplC		1619804..1620379	1619804	1620379	575	-	191	218563293	COG0087J	50S ribosomal protein L3	J	Translation
	2	Cj1709C	Cj1709c		1620899..1621660	1620899	1621660	761	-	253	218563295	COG1187J	putative ribosomal pseudouridine synthase	J	Translation
	2	Cj1713	Cj1713		1625100..1626170	1625100	1626170	1070	+	356	218563299	COG0820R	ribosomal RNA large subunit methyltransferase N	R	General function prediction only
	1	Cj0096	obgE	Y	104798..105850	104798	105850	1052	+	350	218561777	COG0536R	GTPase ObgE	R	General function prediction only
	1	Cj0101	Cj0101	Y	109105..109941	109105	109941	836	+	278	218561782	COG1475K	parB family protein	K	Transcription
	1	Cj0107	atpD	Y	113912..115309	113912	115309	1397	+	465	218561788	COG0055C	F0F1 ATP synthase subunit beta	C	Energy production and conversion genes
	1	Cj0112	tolB	Y	117446..118654	117446	118654	1208	+	402	218561793	COG0823U	translocation protein TolB	U	Intracellular trafficking and secretion genes
	1	Cj0113	pal	Y	118731..119228	118731	119228	497	+	165	218561794	COG2885M	peptidoglycan associated lipoprotein	M	Cell wall/membrane biogenesis genes
	1	Cj0114	Cj0114	Y	119232..120179	119232	120179	947	+	315	218561795	COG1729S	putative periplasmic protein	S	Function unknown genes
	1	Cj0117	pfs	Y	121680..122369	121680	122369	689	+	229	218561798	COG0775F	5'-methylthioadenosine/S-adenosylhomocysteine nucleosidase	F	Nucleotide transport and metabolism genes
	1	Cj0123C	Cj0123c	Y	125503..126429	125503	126429	926	-	308	218561804	COG0042J	putative tRNA-dihydrouridine synthase	J	Translation
	1	Cj0126C	Cj0126c	Y	127776..128237	127776	128237	461	-	153	218561807	COG1576S	hypothetical protein Cj0126c	S	Function unknown genes
	1	Cj0127C	accD	Y	128227..129069	128227	129069	842	-	280	218561808	COG0777I	acetyl-CoA carboxylase subunit beta	I	Lipid transport and metabolism genes
	1	Cj0129C	Cj0129c	Y	129800..132019	129800	132019	2219	-	739	218561810	COG4775M	outer membrane protein	M	Cell wall/membrane biogenesis genes
	1	Cj0130	tyrA	Y	132096..132923	132096	132923	827	+	275	218561811	COG0287E	prephenate dehydrogenase	E	Amino acid transport and metabolism genes
	1	Cj0132	lpxC	Y	134376..135260	134376	135260	884	+	294	218561813	COG0774M	UDP-3-O-	M	Cell wall/membrane biogenesis genes
	1	Cj0015C	Cj0015c		19867..21093	19867	21093	1226	-	408	218561708	COG4940U	hypothetical protein Cj0015c	U	Intracellular trafficking and secretion genes
	1	Cj0149C	hom		152419..153666	152419	153666	1247	-	415	218561830	COG0460E	homoserine dehydrogenase	E	Amino acid transport and metabolism genes
	1	Cj0153c	Cj0153c		156615..157298	156615	157298	683	-	227	218561834	COG0566J	putative rRNA methylase	J	Translation
	1	Cj0154c	Cj0154c		157312..158136	157312	158136	824	-	274	218561835	COG0313R	putative tetrapyrrole methylase family protein	R	General function prediction only
	1	Cj0191c	def		186972..187499	186972	187499	527	-	175	218561870	COG0242J	peptide deformylase	J	Translation
	1	Cj0192c	clpP		187535..188119	187535	188119	584	-	194	218561871	COG0740OU	ATP-dependent Clp protease proteolytic subunit	U	Intracellular trafficking and secretion genes
	1	Cj0194	folE		189596..190168	189596	190168	572	+	190	218561873	COG0302H	GTP cyclohydrolase I	H	Coenzyme transport and metabolism genes
	1	Cj0195	fliI		190168..191553	190168	191553	1385	+	461	218561874	COG1157NU	flagellum-specific ATP synthase	N	Cell motility genes
	1	Cj0206	thrS		202241..204049	202241	204049	1808	+	602	218561885	COG0441J	threonyl-tRNA synthetase	J	Translation
	1	Cj0239C	Cj0239c		221916..222887	221916	222887	971	-	323	218561903	COG0822C	NifU protein	C	Energy production and conversion genes
	1	Cj0269C	ilvE		247656..248570	247656	248570	914	-	304	218561932	COG0115EH	branched-chain amino acid aminotransferase	E	Amino acid transport and metabolism genes
	1	Cj0273	fabZ		250590..251030	250590	251030	440	+	146	218561936	COG0764I	(3R)-hydroxymyristoyl-ACP dehydratase	I	Lipid transport and metabolism genes
	1	Cj0274	lpxA		251030..251821	251030	251821	791	+	263	218561937	COG1043M	UDP-N-acetylglucosamine acyltransferase	M	Cell wall/membrane biogenesis genes
	1	Cj0314	lysA		284283..285491	284283	285491	1208	+	402	218561973	COG0019E	diaminopimelate decarboxylase	E	Amino acid transport and metabolism genes
	1	Cj0319	fliG		290139..291167	290139	291167	1028	+	342	218561978	COG1536N	flagellar motor switch protein G	N	Cell motility genes
	1	Cj0355C	Cj0355c		324163..324834	324163	324834	671	-	223	218562014	COG0745TK	two-component regulator	K	Transcription
	1	Cj0361	lspA		328473..328943	328473	328943	470	+	156	218562019	COG0597MU	lipoprotein signal peptidase	M	Cell wall/membrane biogenesis genes
	1	Cj0389	serS		354279..355514	354279	355514	1235	+	411	218562047	COG0172J	seryl-tRNA synthetase	J	Translation
	1	Cj0407	lgt		371704..372519	371704	372519	815	+	271	218562065	COG0682M	prolipoprotein diacylglyceryl transferase	M	Cell wall/membrane biogenesis genes
	1	Cj0408	frdC		372589..373371	372589	373371	782	+	260	218562066	COG2009C	fumarate reductase cytochrome b-556 subunit	C	Energy production and conversion genes
	1	Cj0426	Cj0426		388595..390172	388595	390172	1577	+	525	218562084	COG0488R	putative ABC transporter ATP-binding protein	R	General function prediction only
	1	Cj0432C	murD		399936..401144	399936	401144	1208	-	402	218562090	COG0771M	UDP-N-acetylmuramoyl-L-alanyl-D-glutamate synthetase	M	Cell wall/membrane biogenesis genes
	1	Cj0434	pgm		402285..403763	402285	403763	1478	+	492	218562092	COG0696G	phosphoglyceromutase	G	Carbohydrate transport and metabolism genes
	1	Cj0458C	miaB		422463..423764	422463	423764	1301	-	433	218562113	COG0621J	(dimethylallyl)adenosine tRNA methylthiotransferase	J	Translation
	1	Cj0459C	Cj0459c		423761..424027	423761	424027	266	-	88	218562114	-	hypothetical protein Cj0459c	X	Not assigned to COGs
	1	Cj0462	Cj0462		426496..427542	426496	427542	1046	+	348	218562117	COG1060HR	hypothetical protein Cj0462	H	Coenzyme transport and metabolism genes
	1	Cj0463	Cj0463		427542..428762	427542	428762	1220	+	406	218562118	COG0612R	zinc protease-like protein	R	General function prediction only
	1	Cj0471	rpmG		435660..435818	435660	435818	158	+	52	218562126	COG0267J	50S ribosomal protein L33	J	Translation
	1	Cj0475	rplA		437153..437854	437153	437854	701	+	233	218562130	COG0081J	50S ribosomal protein L1	J	Translation
	1	Cj0476	rplJ		438006..438485	438006	438485	479	+	159	218562131	COG0244J	50S ribosomal protein L10	J	Translation
	1	Cj0493	fusA		458166..460241	458166	460241	2075	+	691	218562148	COG0480J	elongation factor G	J	Translation
	1	Cj0496	Cj0496		461210..461584	461210	461584	374	+	124	218562151	COG0727R	hypothetical protein Cj0496	R	General function prediction only
	1	Cj0498	trpC		462831..463607	462831	463607	776	+	258	218562153	COG0134E	indole-3-glycerol-phosphate synthase	E	Amino acid transport and metabolism genes
	1	Cj0499	Cj0499		463617..464102	463617	464102	485	+	161	218562154	COG0537FGR	putative histidine triad (HIT) family protein	G	Carbohydrate transport and metabolism genes
	1	Cj0509C	clpB		474662..477235	474662	477235	2573	-	857	218562162	COG0542O	ATP-dependent Clp protease ATP-binding subunit	O	Posttranslational modification, protein turnover, chaperones genes
	1	Cj0537	oorB		500683..501528	500683	501528	845	+	281	218562189	COG1013C	2-oxoglutarate-acceptor oxidoreductase subunit OorB	C	Energy production and conversion genes
	1	Cj0546	ubiD		508224..510026	508224	510026	1802	+	600	218562198	COG0043H	putative 3-octaprenyl-4-hydroxybenzoate carboxy-lyase	H	Coenzyme transport and metabolism genes
	1	Cj0551	efp		513566..514135	513566	514135	569	+	189	218562203	COG0231J	elongation factor P	J	Translation
	1	Cj0579c	Cj0579c		539728..540144	539728	540144	416	-	138	218562230	COG1826U	sec-independent translocase	U	Intracellular trafficking and secretion genes
	1	Cj0581	Cj0581		541371..541841	541371	541841	470	+	156	218562232	COG0494LR	dinucleoside polyphosphate hydrolase	L	Replication, recombination and repair
	1	Cj0585	folP		544189..545331	544189	545331	1142	+	380	218562236	COG0294H	dihydropteroate synthase	H	Coenzyme transport and metabolism genes
	1	Cj0588	tlyA		548257..549018	548257	549018	761	+	253	218562239	COG1189J	putative hemolysin	J	Translation
	1	Cj0589	ribF		548984..549838	548984	549838	854	+	284	218562240	COG0196H	bifunctional riboflavin kinase/FMN adenylyltransferase	H	Coenzyme transport and metabolism genes
	1	Cj0595C	nth		552525..553151	552525	553151	626	-	208	218562246	COG0177L	endonuclease III	L	Replication, recombination and repair
	1	Cj0624	hypC		584837..585118	584837	585118	281	+	93	218562275	COG0298O	hydrogenase isoenzymes formation protein	O	Posttranslational modification, protein turnover, chaperones genes
	1	Cj0646	Cj0646		607943..608770	607943	608770	827	+	275	218562296	COG0797M	putative lipoprotein	M	Cell wall/membrane biogenesis genes
	1	Cj0652	pbpC		611298..613103	611298	613103	1805	+	601	218562302	COG0768M	penicillin-binding protein	M	Cell wall/membrane biogenesis genes
	1	Cj0661C	era		618206..619081	618206	619081	875	-	291	218562306	COG1159R	GTP-binding protein Era	R	General function prediction only
	1	Cj0681	Cj0681		635716..635946	635716	635946	230	+	76	218562320	-	hypothetical protein Cj0681	X	Not assigned to COGs
	1	Cj0684	priA		636594..638447	636594	638447	1853	+	617	218562323	COG1198L	primosome assembly protein PriA	L	Replication, recombination and repair
	1	Cj0710	rpsP		667190..667417	667190	667417	227	+	75	218562349	COG0228J	30S ribosomal protein S16	J	Translation
	1	Cj0712	rimM		667655..668194	667655	668194	539	+	179	218562351	COG0806J	putative 16S rRNA processing protein	J	Translation
	1	Cj0713	trmD		668191..668895	668191	668895	704	+	234	218562352	COG0336J	tRNA (guanine-N(1)-)-methyltransferase	J	Translation
	1	Cj0796C	Cj0796c		747261..747980	747261	747980	719	-	239	218562424	COG0596R	putative hydrolase	R	General function prediction only
	1	Cj0797C	Cj0797c		747982..748197	747982	748197	215	-	71	218562425	-	hypothetical protein Cj0797c	X	Not assigned to COGs
	1	Cj0839C	Cj0839c		788015..788212	788015	788212	197	-	65	218562467	-	hypothetical protein Cj0839c	X	Not assigned to COGs
	1	Cj0840C	fbp		788205..789047	788205	789047	842	-	280	218562468	COG0158G	fructose-1,6-bisphosphatase	G	Carbohydrate transport and metabolism genes
	1	Cj0843C	Cj0843c		790018..791643	790018	791643	1625	-	541	218562471	COG0741M	putative secreted transglycosylase	M	Cell wall/membrane biogenesis genes
	1	Cj0844C	Cj0844c		791640..791921	791640	791921	281	-	93	218562472	-	putative integral membrane protein	X	Not assigned to COGs
	1	Cj0883c	Cj0883c		819740..820150	819740	820150	410	-	136	218562504	COG1959K	putative transcriptional regulator	K	Transcription
	1	Cj0888C	Cj0888c		826268..828199	826268	828199	1931	-	643	218562508	COG0488R	ABC transporter ATP-binding protein	R	General function prediction only
	1	Cj0891C	serA		830135..831718	830135	831718	1583	-	527	218562511	COG0111HE	D-3-phosphoglycerate dehydrogenase	E	Amino acid transport and metabolism genes
	1	Cj0894C	ispH		834005..834838	834005	834838	833	-	277	218562514	COG0761IM	4-hydroxy-3-methylbut-2-enyl diphosphate reductase	M	Cell wall/membrane biogenesis genes
	1	Cj0895C	aroA		834828..836114	834828	836114	1286	-	428	218562515	COG0128E	3-phosphoshikimate 1-carboxyvinyltransferase	E	Amino acid transport and metabolism genes
	1	Cj0897C	pheS		838429..839421	838429	839421	992	-	330	218562517	COG0016J	phenylalanyl-tRNA synthetase subunit alpha	J	Translation
	1	Cj0930	Cj0930		863661..864764	863661	864764	1103	+	367	218562549	COG0012J	GTP-dependent nucleic acid-binding protein EngD	J	Translation
	1	Cj0936	atpE		872516..872854	872516	872854	338	+	112	218562555	-	F0F1 ATP synthase subunit C	X	Not assigned to COGs
	1	Cj0949c	Cj0949c		889279..890256	889279	890256	977	-	325	218562568	COG2957E	putative peptidyl-arginine deiminase family protein	E	Amino acid transport and metabolism genes
	1	Cj0961C	rpmH		901364..901498	901364	901498	134	-	44	218562580	-	50S ribosomal protein L34	X	Not assigned to COGs
	1	Cj0976	Cj0976		910711..911601	910711	911601	890	+	296	218562592	COG2227H	putative methyltransferase	H	Coenzyme transport and metabolism genes
	1	Cj0994C	argF		925252..926172	925252	926172	920	-	306	218562610	COG0078E	ornithine carbamoyltransferase	E	Amino acid transport and metabolism genes
	1	Cj1038	Cj1038		971900..973063	971900	973063	1163	+	387	218562654	COG0772D	putative cell division/peptidoglycan biosynthesis protein	D	Cell cycle control, mitosis and meiosis genes
	1	Cj1039	murG		973060..974088	973060	974088	1028	+	342	218562655	COG0707M	undecaprenyldiphospho-muramoylpentapeptide beta-N- acetylglucosaminyltransferase	M	Cell wall/membrane biogenesis genes
	1	Cj1070	rpsF		1005152..1005529	1005152	1005529	377	+	125	218562684	COG0360J	30S ribosomal protein S6	J	Translation
	1	Cj1071	ssb		1005538..1006089	1005538	1006089	551	+	183	218562685	COG0629L	single-stranded DNA-binding protein	L	Replication, recombination and repair
	1	Cj1073C	lon		1006421..1008796	1006421	1008796	2375	-	791	218562687	COG0466O	ATP-dependent protease La	O	Posttranslational modification, protein turnover, chaperones genes
	1	Cj1094C	yajC		1027809..1028081	1027809	1028081	272	-	90	218562708	COG1862U	preprotein translocase subunit YajC	U	Intracellular trafficking and secretion genes
	1	Cj1095	Cj1095		1028054..1029379	1028054	1029379	1325	+	441	218562709	COG0815M	apolipoprotein N-acyltransferase	M	Cell wall/membrane biogenesis genes
	1	Cj1101	Cj1101		1035226..1037301	1035226	1037301	2075	+	691	218562715	COG0210L	ATP-dependent DNA helicase	L	Replication, recombination and repair
	1	Cj1117C	prmA		1049764..1050609	1049764	1050609	845	-	281	218562731	COG2264J	ribosomal protein L11 methyltransferase	J	Translation
	1	Cj1124C	pglC		1056244..1056846	1056244	1056846	602	-	200	218562738	COG2148M	galactosyltransferase	M	Cell wall/membrane biogenesis genes
	1	Cj1125C	pglA		1056839..1057969	1056839	1057969	1130	-	376	218562739	COG0438M	GalNAc transferase	M	Cell wall/membrane biogenesis genes
	1	Cj1127C	pglJ		1060124..1061221	1060124	1061221	1097	-	365	218562741	COG0438M	GalNAc transferase	M	Cell wall/membrane biogenesis genes
	1	Cj1171C	ppi		1100192..1100674	1100192	1100674	482	-	160	218562783	COG0652O	peptidyl-prolyl cis-trans isomerase	O	Posttranslational modification, protein turnover, chaperones genes
	1	Cj1175C	argS		1102167..1103759	1102167	1103759	1592	-	530	218562787	COG0018J	arginyl-tRNA synthetase	J	Translation
	1	Cj1181C	tsf		1107719..1108792	1107719	1108792	1073	-	357	218562793	COG0264J	elongation factor Ts	J	Translation
	1	Cj1184C	petC		1110990..1112114	1110990	1112114	1124	-	374	218562796	COG2857C	putative ubiquinol-cytochrome C reductase cytochrome C subunit	C	Energy production and conversion genes
	1	Cj1185C	petB		1112111..1113361	1112111	1113361	1250	-	416	218562797	COG1290C	putative ubiquinol-cytochrome C reductase cytochrome B subunit	C	Energy production and conversion genes
	1	Cj1207c	Cj1207c		1136315..1136872	1136315	1136872	557	-	185	218562819	COG0526OC	putative lipoprotein thiredoxin	O	Posttranslational modification, protein turnover, chaperones genes
	1	Cj1208	Cj1208		1136955..1137581	1136955	1137581	626	+	208	218562820	COG0212H	putative 5-formyltetrahydrofolate cyclo-ligase family protein	H	Coenzyme transport and metabolism genes
	1	Cj1221	groEL		1149475..1151112	1149475	1151112	1637	+	545	218562833	COG0459O	chaperonin GroEL	O	Posttranslational modification, protein turnover, chaperones genes
	1	Cj1227C	Cj1227c		1155511..1156185	1155511	1156185	674	-	224	218562839	COG0745TK	putative two-component regulator	K	Transcription
	1	Cj1228C	htrA		1156261..1157679	1156261	1157679	1418	-	472	218562840	COG0265O	serine protease	O	Posttranslational modification, protein turnover, chaperones genes
	1	Cj1231	kefB		1159168..1160793	1159168	1160793	1625	+	541	218562843	COG0475P	putative glutathione-regulated potassium-efflux system protein	P	Inorganic ion transport and metabolism genes
	1	Cj1243	hemE		1170922..1171944	1170922	1171944	1022	+	340	218562855	COG0407H	uroporphyrinogen decarboxylase	H	Coenzyme transport and metabolism genes
	1	Cj1246C	uvrC		1174038..1175840	1174038	1175840	1802	-	600	218562858	COG0322L	excinuclease ABC subunit C	L	Replication, recombination and repair
	1	Cj1252	Cj1252		1181476..1183524	1181476	1183524	2048	+	682	218562864	COG1452M	putative periplasmic protein	M	Cell wall/membrane biogenesis genes
	1	Cj1262	racS		1192456..1193691	1192456	1193691	1235	+	411	218562874	COG0642T	two-component sensor histidine kinase	T	Signal transduction mechanisms genes
	1	Cj1264C	hydD		1194260..1194796	1194260	1194796	536	-	178	218562876	COG0680C	putative hydrogenase maturation protease	C	Energy production and conversion genes
	1	Cj1265C	hydC		1194793..1195485	1194793	1195485	692	-	230	218562877	COG1969C	Ni/Fe-hydrogenase B-type cytochrome subunit	C	Energy production and conversion genes
	1	Cj1272C	spoT		1204596..1206791	1204596	1206791	2195	-	731	218562884	COG0317TK	putative guanosine-3',5'-bis(diphosphate) 3'-pyrophosphohydrolase	K	Transcription
	1	Cj1274C	pyrH		1207010..1207729	1207010	1207729	719	-	239	218562886	COG0528F	uridylate kinase	F	Nucleotide transport and metabolism genes
	1	Cj1275C	Cj1275c		1207781..1208974	1207781	1208974	1193	-	397	218562887	COG0739M	putative peptidase M23 family protein	M	Cell wall/membrane biogenesis genes
	1	Cj1278C	trmB		1210499..1211677	1210499	1211677	1178	-	392	218562890	COG0220R	tRNA (guanine-N(7)-)-methyltransferase	R	General function prediction only
	1	Cj1280C	Cj1280c		1212857..1213825	1212857	1213825	968	-	322	218562892	COG0564J	putative ribosomal pseudouridine synthase	J	Translation
	1	Cj1291C	accB		1223636..1224091	1223636	1224091	455	-	151	218562902	COG0511I	putative biotin carboxyl carrier protein of acetyl-CoA carboxylase	I	Lipid transport and metabolism genes
	1	Cj1382C	fldA		1320852..1321343	1320852	1321343	491	-	163	218562991	COG0716C	flavodoxin FldA	C	Energy production and conversion genes
	1	Cj1481c	Cj1481c		1415898..1418663	1415898	1418663	2765	-	921	218563082	COG1074L	putative recombination protein RecB	L	Replication, recombination and repair
	1	Cj1482c	Cj1482c		1418660..1421026	1418660	1421026	2366	-	788	218563083	COG3893L	hypothetical protein Cj1482c	L	Replication, recombination and repair
	1	Cj1484c	Cj1484c		1421531..1422133	1421531	1422133	602	-	200	218563085	-	hypothetical protein Cj1484c	X	Not assigned to COGs
	1	Cj1485c	Cj1485c		1422130..1422231	1422130	1422231	101	-	33	218563086	-	putative periplasmic protein	X	Not assigned to COGs
	1	Cj1486c	Cj1486c		1422228..1422449	1422228	1422449	221	-	73	218563087	-	putative periplasmic protein	X	Not assigned to COGs
	1	Cj1488c	ccoQ		1423309..1423572	1423309	1423572	263	-	87	218563089	COG4736O	cb-type cytochrome C oxidase subunit IV	O	Posttranslational modification, protein turnover, chaperones genes
	1	Cj1608	Cj1608		1535886..1536773	1535886	1536773	887	+	295	218563197	COG0745TK	putative two-component regulator	K	Transcription
	1	Cj1641	murE		1565648..1566931	1565648	1566931	1283	+	427	218563230	COG0769M	UDP-N-acetylmuramoylalanyl-D-glutamate--2,6-diaminopimelate ligase	M	Cell wall/membrane biogenesis genes
	1	Cj1688C	secY		1610956..1612221	1610956	1612221	1265	-	421	218563274	COG0201U	preprotein translocase subunit SecY	U	Intracellular trafficking and secretion genes
	1	Cj1690C	rpsE		1612618..1613061	1612618	1613061	443	-	147	218563276	COG0098J	30S ribosomal protein S5	J	Translation
	1	Cj1692C	rplF		1613439..1613975	1613439	1613975	536	-	178	218563278	COG0097J	50S ribosomal protein L6	J	Translation
	1	Cj1696C	rplX		1615195..1615428	1615195	1615428	233	-	77	218563282	COG0198J	50S ribosomal protein L24	J	Translation
	1	Cj1701C	rpsC		1616657..1617358	1616657	1617358	701	-	233	218563287	COG0092J	30S ribosomal protein S3	J	Translation
	1	Cj1706C	rplD		1619193..1619807	1619193	1619807	614	-	204	218563292	COG0088J	50S ribosomal protein L4	J	Translation
	1	Cj1708C	rpsJ		1620389..1620700	1620389	1620700	311	-	103	218563294	COG0051J	30S ribosomal protein S10	J	Translation
	1	Cj1711C	ksgA		1623659..1624459	1623659	1624459	800	-	266	218563297	COG0030J	dimethyladenosine transferase	J	Translation
